# Supplementary material for: HOG-Independent Osmoprotection by Erythritol in Yeast Yarrowia lipolytica
Source: PubMed Central journal article supplement (PMC7761004; doi:10.3390/genes11121424), 2020-11-27
Supplement: genes-11-01424-s001.pdf [file genes-11-01424-s001.pdf]

Supplementary Material

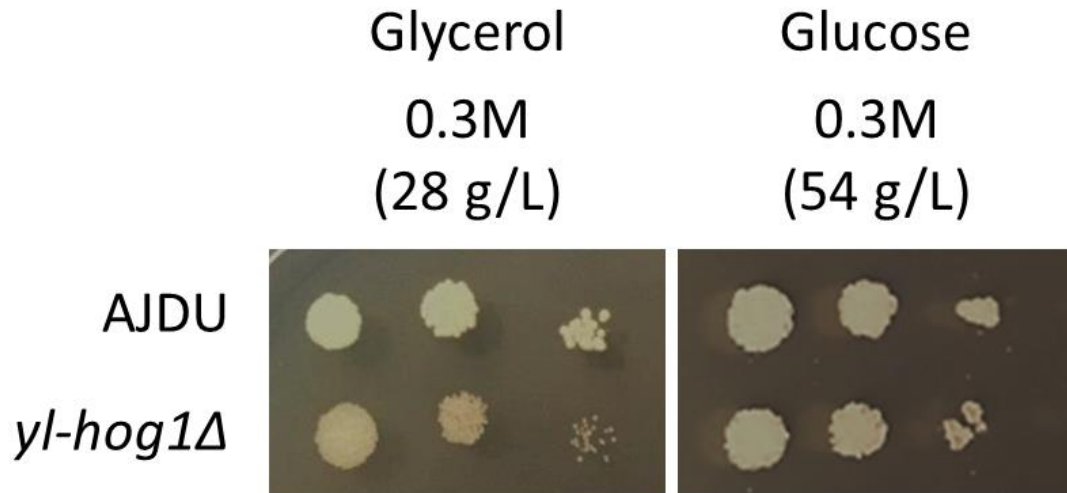

**Figure S1.** Growth of *Y. lipolytica* AJDU and *yl-hog1Δ* after 48 h of incubation on YNB agar plates with 0.3 M carbon sources.
